# Supplementary material for: Linking the 2030 Agenda for Sustainable Development to Research, Newspapers, and Governance: The Case of the Last Free-Flowing Alpine River
Source: Frontiers journal article supplement (doi:10.3389/fenvs.2021.553822), 2021-02-19
Supplement: Table_1.XLSX [file Table_1.XLSX]

## Sheet: Legend
Linking the 2030 Agenda for Sustainable Development to research, regulatory and newspaper coverage: the case of the last free-flowing river in the Alps
Supplementary information
1. List of local regulation documents	List of the 21 local regulation documents used including source
2. List of relevant (a) SDG and (b) SENDAI targets	List of (a) SDG and (b) SENDAI targets and priorities identified as relevant by all five authors. The full text of each target/priority is shown.
3. UN keywords	List of UN keywords and occurrences identified for the academic, newspapers and regulation information sources by all five authors. The keywords occurring at least once in any of the three information sources are shown.

## Sheet: 1.LocalRegulationDocuments
TITLE	LINK	YEAR	ORGANIZATION
ALLEGATO ALLA DELIBERA N. 676 DEL 11 APRILE 2013 - Indirizzi per l’individuazione dei corsi d’acqua, o di tratti dei medesimi, nei quali è necessaria l’esecuzione degli interventi di manutenzione degli alvei che prevedono l’estrazione ed asporto di materiale litoide. Aggiornamento. Trieste, 30 gennaio 2013	http://mtom.regione.fvg.it/storage/2013_676/Allegato%201%20alla%20Delibera%20676-2013.pdf	2013	Regione Autonoma Friuli Venezia-Giulia
Commissione regionale “Laboratorio Tagliamento”, Documento di sintesi, Udine, 28 settembre 2011	https://www.regione.fvg.it/rafvg/export/sites/default/RAFVG/ambiente-territorio/tutela-ambiente-gestione-risorse-naturali/FOGLIA206/FOGLIA3/allegati/Documento_sintesi_28settembre2011.pdf	2011	Regione Autonoma Friuli Venezia-Giulia
Piano stralcio per l’Assetto Idrogeologico dei bacini idrografici dei fiumi ISONZO, TAGLIAMENTO, PIAVE E BRENTA-BACCHIGLIONE, NORME DI ATTUAZIONE D. Lgs. 152/2006 – Allegato all delibera n.3 del Comitato Istituzionale del 9 novembre 2012. Venezia, giugno 2012.	http://pai.adbve.it/PAI_4B_2012/relazione/norme_Attuazione_PAI_4bacini.pdf	2012	Autorità di Bacino dei fiumi Isonzo, Tagliamento, Livenza, Piave, Brenta-Bacchiglione
Piano regionale di tutela delle acque – Descrizione generale del territorio	http://www.regione.fvg.it/rafvg/export/sites/default/RAFVG/ambiente-territorio/pianificazione-gestione-territorio/FOGLIA20/FOGLIA22/allegati/1_-_Descrizione_generale_territorio.pdf	2018	Regione Autonoma Friuli Venezia-Giulia
Piano regionale di tutela delle acque –Indirizzi di piano	http://www.regione.fvg.it/rafvg/export/sites/default/RAFVG/ambiente-territorio/pianificazione-gestione-territorio/FOGLIA20/FOGLIA22/allegati/4_-_Norme_di_attuazione.pdf	2018	Regione Autonoma Friuli Venezia-Giulia
Piano regionale di tutela delle acque –Norme di attuazione	http://www.regione.fvg.it/rafvg/export/sites/default/RAFVG/ambiente-territorio/pianificazione-gestione-territorio/FOGLIA20/FOGLIA22/allegati/4_-_Norme_di_attuazione.pdf	2018	Regione Autonoma Friuli Venezia-Giulia
Piano regionale di tutela delle acque –Rapporto ambientale	http://www.regione.fvg.it/rafvg/export/sites/default/RAFVG/ambiente-territorio/pianificazione-gestione-territorio/FOGLIA20/FOGLIA22/allegati/7_-_Rapporto_ambientale.pdf	2018	Regione Autonoma Friuli Venezia-Giulia
Piano regionale di tutela delle acque –Sintesi non tecnica rapporto ambientale	http://www.regione.fvg.it/rafvg/export/sites/default/RAFVG/ambiente-territorio/pianificazione-gestione-territorio/FOGLIA20/FOGLIA22/allegati/7_-_Rapporto_ambientale.pdf	2018	Regione Autonoma Friuli Venezia-Giulia
Piano di bacino del fiume Tagliamento - Piano stralcio per la sicurezza idraulica del medio e basso Tagliamento- 1997		1997	Autorità di Bacino dei fiumi Isonzo, Tagliamento, Livenza, Piave, Brenta-Bacchiglione
Progetto di piano stralcio per l’assetto idrogeologico dei bacini idrografici dei fiumi isonzo, tagliamento, piave, brenta-bacchiglione, 19 giugno 2007, relazione tecnica.	http://www.adbve.it/pai_old/RelazioneVAR_PAI_ITPB.pdf	2007	Autorità di Bacino dei fiumi Isonzo, Tagliamento, Livenza, Piave, Brenta-Bacchiglione
Progetto di piano stralcio per l’assetto idrogeologico dei bacini idrografici dei fiumi isonzo, tagliamento, piave, brenta-bacchiglione, 19 giugno 2007, relazione generale	http://pai.adbve.it/PAI_4B_2012/relazione/Relazione_PAI_4bacini.pdf	2007	Autorità di Bacino dei fiumi Isonzo, Tagliamento, Livenza, Piave, Brenta-Bacchiglione
Progetto di piano stralcio per l’assetto idrogeologico dei bacini idrografici dei fiumi isonzo, tagliamento, piave, brenta-bacchiglione, 19 giugno 2007, progetto di variante		2007	Autorità di Bacino dei fiumi Isonzo, Tagliamento, Livenza, Piave, Brenta-Bacchiglione
Commissione regionale “Laboratorio Tagliamento”, schede di sintesi delle proposte di soluzioni alternative (allegato al doc. Di sintesi).		2011	Regione Autonoma Friuli Venezia-Giulia
Allegato alla delibera n. 1306 del 26 luglio 2019 – servizio biodiversità – piani di gestione della zsc it3310007 – allegato 1 relazione di piano.		2019	Regione Autonoma Friuli Venezia-Giulia
Allegato alla delibera n. 1306 del 26 luglio 2019 – servizio biodiversità – piani di gestione della zsc it3310007 – allegato 5 tabella delle misure di conservazione		2019	Regione Autonoma Friuli Venezia-Giulia
Allegato alla delibera n. 1306 del 26 luglio 2019 – servizio biodiversità – piani di gestione della zsc it3310007 – allegato 6 schede azione delle misure di conservazione		2019	Regione Autonoma Friuli Venezia-Giulia
Allegato alla delibera n. 1306 del 26 luglio 2019 – servizio biodiversità – piani di gestione della zsc it3310007 – allegato 7 documenti relativi al processo partecipativo		2019	Regione Autonoma Friuli Venezia-Giulia
Allegato alla delibera n. 1306 del 26 luglio 2019 – servizio biodiversità – piani di gestione della zsc it3310007 – allegato 8 verifica di assoggettabilità a sceening di valutazione ambientale strategica		2019	Regione Autonoma Friuli Venezia-Giulia
Allegato alla delibera n. 1306 del 26 luglio 2019 – servizio biodiversità – piani di gestione della zsc it3310015 valle del medio tagliamento– allegato 9 aree di interferenza esterna al sito		2019	Regione Autonoma Friuli Venezia-Giulia
Estratto del processo verbale della seduta del 26 luglio 2019 – piano di gestione della zsc it3310007 greto del tagliamento, adozione.		2019	Regione Autonoma Friuli Venezia-Giulia

## Sheet: 2.RelevantSDGandSENDAI
(a) SDG	Target
6	6.1	By 2030, achieve universal and equitable access to safe and affordable drinking water for all
6	6.3	By 2030, improve water quality by reducing pollution, eliminating dumping and minimizing release of hazardous chemicals and materials, halving the proportion of untreated wastewater and substantially increasing recycling and safe reuse globally
6	6.4	By 2030, substantially increase water-use efficiency across all sectors and ensure sustainable withdrawals and supply of freshwater to address water scarcity and substantially reduce the number of people suffering from water scarcity
6	6.5	By 2030, implement integrated water resources management at all levels, including through transboundary cooperation as appropriate
6	6.6	By 2020, protect and restore water-related ecosystems, including mountains, forests, wetlands, rivers, aquifers and lakes
6	6.6A	By 2030, expand international cooperation and capacity-building support to developing countries in water- and sanitation-related activities and programmes, including water harvesting, desalination, water efficiency, wastewater treatment, recycling and reuse technologies
6	6.6B	Support and strengthen the participation of local communities in improving water and sanitation management
11	11.5	By 2030, significantly reduce the number of deaths and the number of people affected and substantially decrease the direct economic losses relative to global gross domestic product caused by disasters, including water-related disasters, with a focus on protecting the poor and people in vulnerable situations
11	11.B	By 2020, substantially increase the number of cities and human settlements adopting and implementing integrated policies and plans towards inclusion, resource efficiency, mitigation and adaptation to climate change, resilience to disasters, and develop and implement, in line with the Sendai Framework for Disaster Risk Reduction 2015-2030, holistic disaster risk management at all levels
12	12.4	By 2020, achieve the environmentally sound management of chemicals and all wastes throughout their life cycle, in accordance with agreed international frameworks, and significantly reduce their release to air, water and soil in order to minimize their adverse impacts on human health and the environment
13	13.1	Strengthen resilience and adaptive capacity to climate-related hazards and natural disasters in all countries
15	15.1	By 2020, ensure the conservation, restoration and sustainable use of terrestrial and inland freshwater ecosystems and their services, in particular forests, wetlands, mountains and drylands, in line with obligations under international agreements
15	15.8	By 2020, introduce measures to prevent the introduction and significantly reduce the impact of invasive alien species on land and water ecosystems and control or eradicate the priority species
	15.A	Mobilize and significantly increase financial resources from all sources to conserve and sustainably use biodiversity and ecosystems
(b) SENDAI	Target/Priority
Target a	a	(a) Substantially reduce global disaster mortality by 2030, aiming to lower average per 100,000 global mortality rate in the decade 2020-2030 compared to the period 2005-2015.
Target c	c	(c) Reduce direct disaster economic loss in relation to global gross domestic product (GDP) by 2030.
Target d	d	(d) Substantially reduce disaster damage to critical infrastructure and disruption of basic services, among them health and educational facilities, including through developing their resilience by 2030.
Target g	g	(g) Substantially increase the availability of and access to multi-hazard early warning systems and disaster risk information and assessments to the people by 2030.
Priority 1.	1	Understanding disaster risk. Disaster risk management should be based on an understanding of disaster risk in all its dimensions of vulnerability, capacity, exposure of persons and assets, hazard characteristics and the environment. Such knowledge can be used for risk assessment, prevention, mitigation, preparedness and response.
Priority 2.	2	Strengthening disaster risk governance to manage disaster risk. Disaster risk governance at the national, regional and global levels is very important for prevention, mitigation, preparedness, response, recovery, and rehabilitation. It fosters collaboration and partnership.
Priority 3.	3	Investing in disaster risk reduction for resilience. Public and private investment in disaster risk prevention and reduction through structural and non-structural measures are essential to enhance the economic, social, health and cultural resilience of persons, communities, countries and their assets, as well as the environment.
Priority 4.	4	Enhancing disaster preparedness for effective response and to “Build Back Better” in recovery, rehabilitation and reconstruction. The growth of disaster risk means there is a need to strengthen disaster preparedness for response, take action in anticipation of events, and ensure capacities are in place for effective response and recovery at all levels. The recovery, rehabilitation and reconstruct…

## Sheet: 3.UNkeywords
UN keyword	Academic	Newspapers	Regulation
access	4	60	100
adaptation	2	1	20
adaptation to climate change	0	0	2
alien species	1	0	1
aquifer	22	0	0
biodiversity	32	14	189
capacity	17	23	260
capacity-building	0	37	95
climate	28	51	219
climate change	8	0	0
collaboration	0	96	35
conservation	30	14	501
cooperation	0	2	6
disaster	0	10	9
drinking water	0	8	29
ecosystem	97	43	192
environment	101	300	389
exposure	5	7	41
financial resources	0	3	3
freshwater	3	12	57
freshwater ecosystems	2	0	0
governance	0	0	8
hazard	22	15	704
human health	0	1	42
infrastructure	1	41	270
invasive alien species	0	0	1
investing	0	42	45
lake	3	0	0
management of chemicals	0	142	113
mitigation	5	19	350
mortality	3	0	17
participation	0	20	41
pollution	4	40	178
preparedness	0	2	12
prevention	0	27	42
private investment	0	0	1
protection	7	84	262
reconstruction	8	9	89
recovery	19	38	146
rehabilitation	6	38	231
resilience	12	13	31
response	67	76	32
restoration	64	3	70
risk	18	297	795
risk management	1	12	11
risk mitigation	1	13	116
risk prevention	0	2	3
risk reduction	0	5	20
services	1	171	332
transboundary cooperation	0	0	1
vulnerability	2	0	116
wastewater	3	3	228
wastewater treatment	0	0	28
water ecosystem	2	1	20
water efficiency	0	0	1
water management	3	0	0
water resource	6	5	192
water resource management	0	2	12
water scarcity	1	0	6
wetland	12	4	35
withdrawal	5	0	0
